# Supplementary material for: In situ reduction and coating of SnS2 nanobelts for free-standing SnS@polypyrrole-nanobelt/carbon-nanotube paper electrodes with superior Li-ion storage
Source: Royal Society of Chemistry journal article supplement (doi:10.1039/c5ta00431d), 2015-01-01
Supplement: c5ta00431d1.pdf [file c5ta00431d1.pdf]

## Electronic Supplementary Information

### **In situ reduction and coating of SnS<sub>2</sub> nanobelts for free-standing SnS@polypyrrole-nanobelt/carbon-nanotube paper electrodes with superior Li-ion storage**

*Jun Liu,<sup>b</sup> Yuren Wen,<sup>c</sup> Peter A. van Aken,<sup>c</sup> Joachim Maier,<sup>b</sup> and Yan Yu<sup>\*a,b</sup>*

<sup>a</sup>CAS Key Laboratory of Materials for Energy Conversion, Department of Chemistry  
and Materials Science, University of Science and Technology of China, Anhui Hefei  
230026, China, E-mail: yanyumse@ustc.edu.cn

<sup>b</sup>Max Planck Institute for Solid State Research, Heisenbergstr. 1, Stuttgart, 70569,  
Germany

<sup>c</sup>Max Planck Institute for Intelligent Systems, Heisenbergstr. 3, Stuttgart, 70569,  
Germany

## Experimental Sections

### Fabrication of uniform SnS<sub>2</sub> nanobelts

SnS<sub>2</sub> nanobelts were synthesized through a template-free dodecanethiol-modified solvothermal route. In a typical synthesis process, 12 mL CS<sub>2</sub> and 12 mL dodecanethiol were firstly added to the mixture of 100 distilled water and 30 mL NH<sub>3</sub>·H<sub>2</sub>O; subsequently, 20 mmol tin (IV) chloride was dissolved in this mixed solution to form a primrose solution, which was then transferred to Teflon-lined stainless steel autoclave at 180 °C for 48 h. After the solution was cooled down to room temperature, the obtained yellow precursors were collected by centrifuging the mixture, which were then washed with ethanol and distilled water several times and dried in vacuum at 60 °C.

During the solvothermal crystallization of SnS<sub>2</sub> nanobelts, the formation mechanism of the SnS<sub>2</sub> phase is based on the reaction among tin (IV) chloride, CS<sub>2</sub>, NH<sub>3</sub>·H<sub>2</sub>O and dodecanethiol, which can be described as below:<sup>[1]</sup>

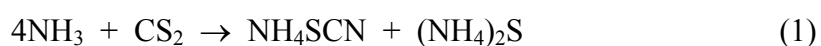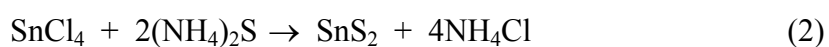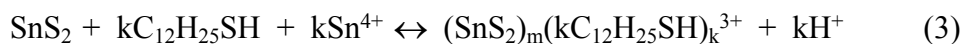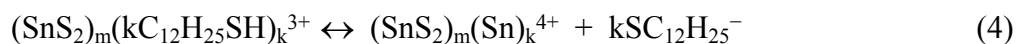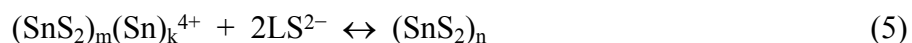

In the above, via equation (1) and (2), SnS<sub>2</sub> began to form. However, in the absence of dodecanethiol, SnS<sub>2</sub> would be dissolved by S<sup>2-</sup>. Dodecanethiol was absorbed tightly on SnS<sub>2</sub> surface, which prevented S<sup>2-</sup> from attacking. According to previous research

work,<sup>[2]</sup> dodecanethiol could coordinated with  $\text{Sn}^{4+}$  via equation (3), forming  $(\text{SnS}_2)_m(\text{kC}_{12}\text{H}_{25}\text{SH})_k^{3+}$  complexed clusters in the solution. Equation (4) indicated the dissolution of  $\text{SC}_{12}\text{H}_{25}^-$  from the complexed  $\text{SnS}_2$  clusters. Finally, stable  $\text{SnS}_2$  was formed through equation (5).

### **Fabrication of free-standing SnS@PPy-NB /CNT paper electrode**

Firstly, SnS@PPy nanobelts were synthesized via pyrrole-induce reductive transformation reaction in hydrothermal environment. In a typical chemical transformation procedure,  $\text{SnS}_2$  samples (0.1 g) were added to deionized water to form a dispersion solution under constant strong stirring. Then, pyrrole (0.4 mL) was added to the dispersion solution and kept stirring for 30 min. The dispersion was transferred into a Teflon-lined autoclave. The sealed vessel was then maintained at 160 °C for 40 h, and cooled naturally. The samples were collected and washed six times with ethanol and water, respectively, and dried under vacuum at 50 °C. Finally, 90 mg SnS@PPy nanobelts and 15.9 mg multi-walled CNTs (Figure S2,4 in Electronic Supplementary Information) were dispersed in 120 mL  $\text{H}_2\text{O}$  then sonicated for 1 h and filter through a mixed cellulose ester membrane (1.2  $\mu\text{m}$  pore size, milipore). Then obtained filter film was then vacuum dried for 24 h to get free-standing film.

### **Materials characterization**

The collected products were characterized by an X-ray diffractometry (XRD) on a

Rigaku-DMax 2400 diffractometer equipped with the graphite monochromatized Cu K $\alpha$  radiation flux at a scanning rate of 0.02°s<sup>-1</sup>. Scanning electron microscopy (SEM) analysis was carried using a Zeiss Gemini DSM 982 scanning electron microscope. The structure of these SnS<sub>2</sub> nanobelts and SnS@PPy porous nanobelts was investigated by means of transmission electron microscopy (TEM, JEOL 4000FX). Nitrogen adsorption and desorption isotherms were measured at 77 K with a Quadrachrome Adsorption Instrument.

### **Electrochemical testing**

The electrochemical performances of the as-prepared products were measured by using two-electrode Swagelok-type cells. The free-standing SnS@PPy-NB/CNT paper was cut and directly investigated as an anode for Li-ion batteries. For assembling Li-ion batteries, a Li foil was used as the counter electrode and a solution of 1 M LiPF<sub>6</sub> in ethylene carbonate (EC)/diethyl carbonate (DEC) (1:1 in volume) was used as electrolyte. The charge/discharge curves and cycling capacity were evaluated by an Arbin MSTAT battery test system in the cut-off voltages of 0.01 and 3.0 V. Cyclic voltammetry (CV) was performed using a VoltaLab 80 electrochemical workstation.

### **References**

1. D. Ma, W. Zhang, Q. Tang, R. Zhang, W. Yu, Y. Qian, *J. Nanosci. Nanotech.* **2005**, 5, 806.

2. H. Zhang, Y. J. Ji, X. Y. Ma, J. Xu, D. Yang, *Nanotechnology* **2003**, *14*, 974.

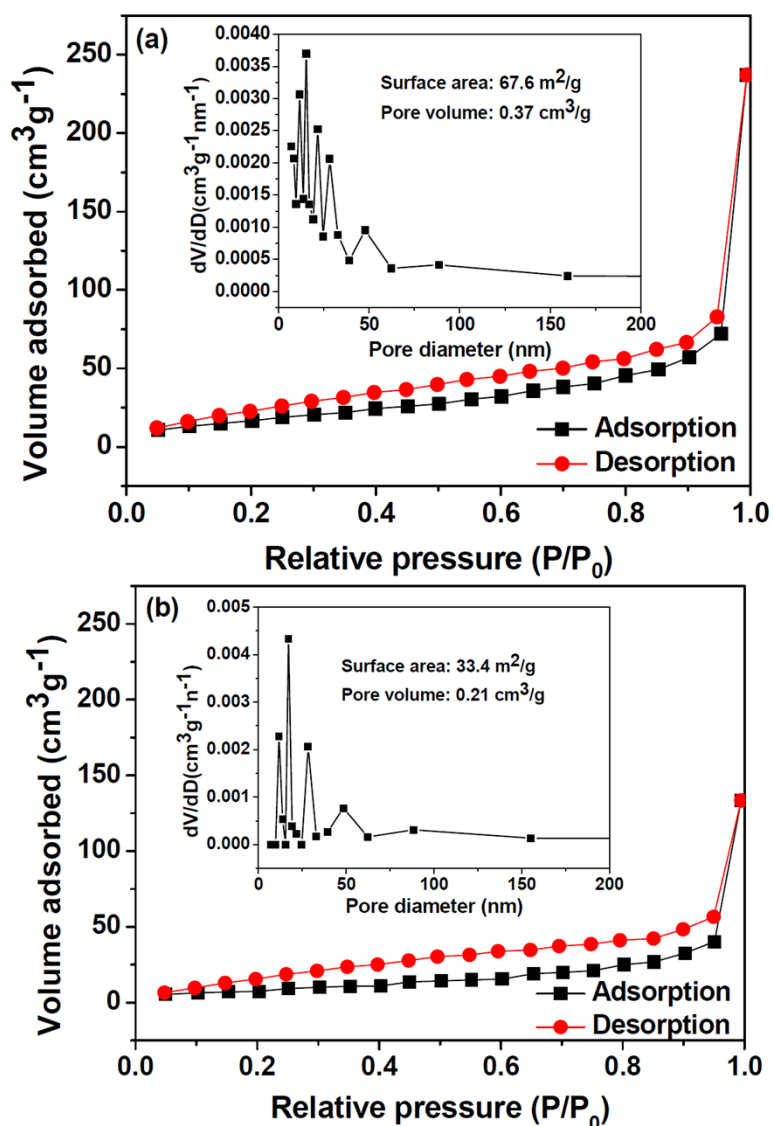

**Figure S1.** N<sub>2</sub> adsorption/desorption isotherms and the corresponding pore size distribution (the inset) of SnS@PPy porous nanobelts (a) and SnS<sub>2</sub> nanobelts (b). As shown in the inset of Figure S1a and S1b, the SnS<sub>2</sub> nanobelt precursor has a surface area of 33.4 m<sup>2</sup>/g and pore volume of 0.21 cm<sup>3</sup>/g. While after the reduction, the surface area and pore volume of SnS@PPy-NBs sample has increased into 67.6 m<sup>2</sup>/g and 0.37 cm<sup>3</sup>/g, respectively. The generated pores during the reduction of SnS<sub>2</sub> are mesopores, and mainly distributed in the range of 17 nm to 26 nm.

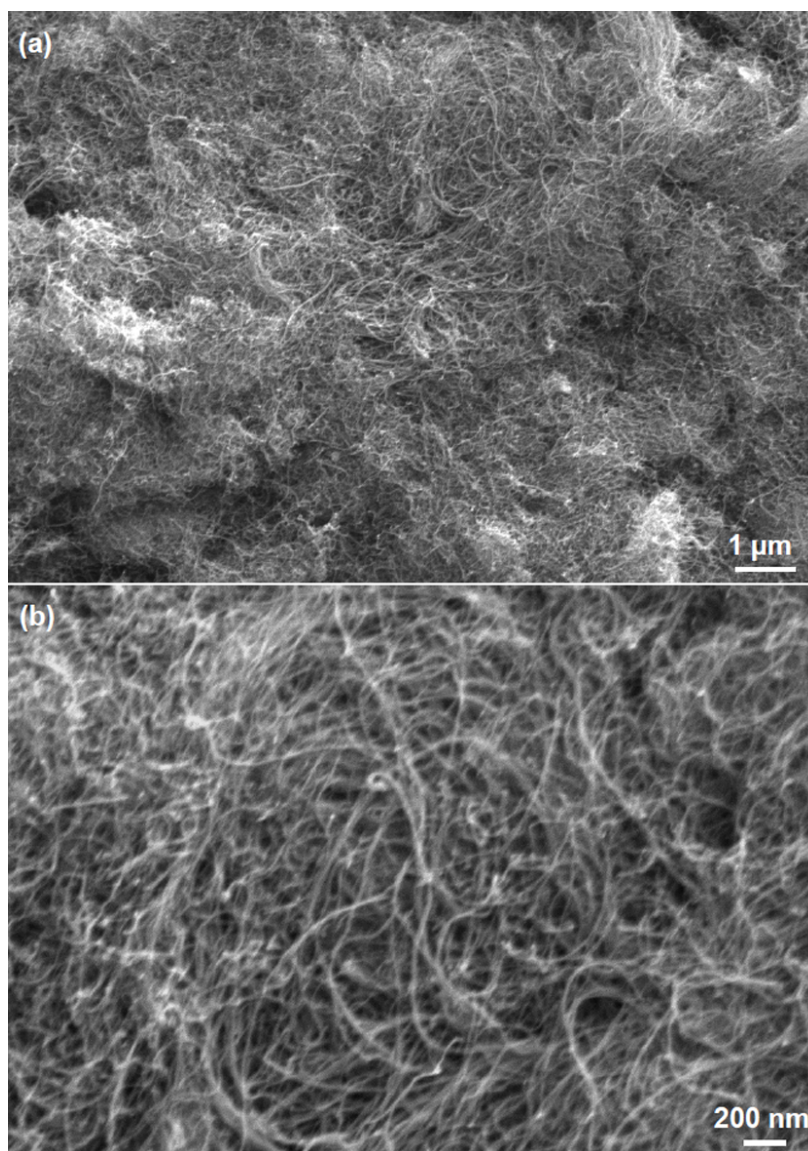

**Figure S2.** Low and high-magnification SEM images of commercial multi-walled CNTs with diameter of 6-9 nm produced by Sigma-Aldrich Co. LLC.

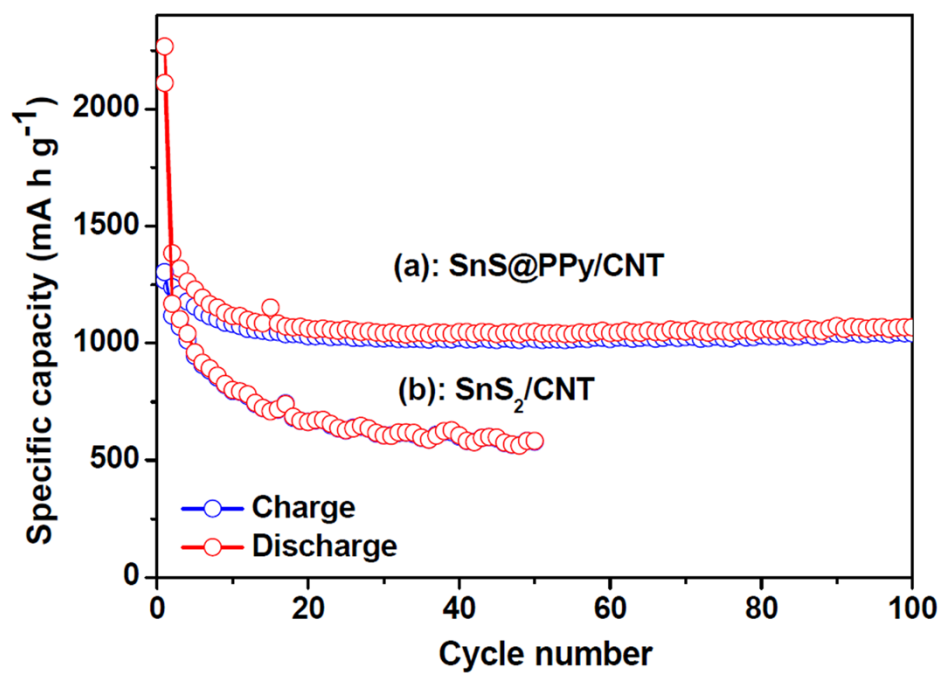

**Figure S3.** Li-ion storage performances of the PPy-coated SnS@PPy/CNT (a) and without PPy-coated SnS<sub>2</sub>/CNT (b) electrodes at a current density of 0.1C. The enhanced electrochemical performance of PPy-coated samples should be ascribed to that the polymerized conductive PPy thin layers not only improve the electrode's conductivity, but also protect the inner SnS nanobelts from mechanical damage during charging/discharging.

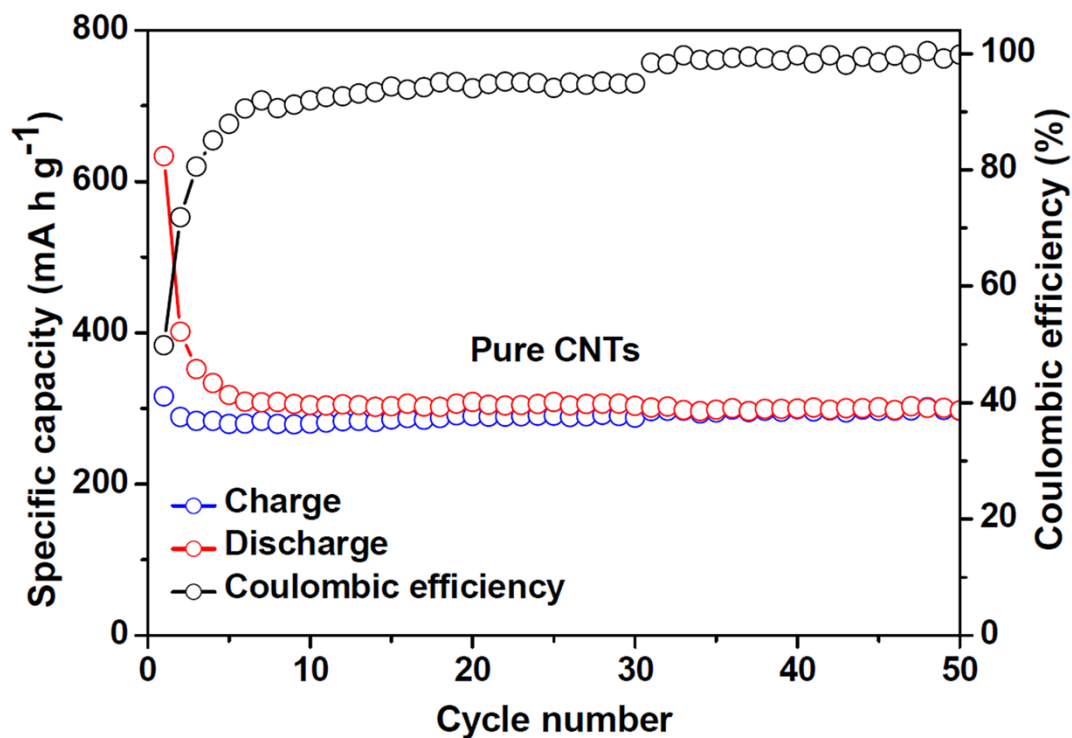

**Figure S4.** Cycling capacity for the 50 galvanostatic cycles of pure CNTs and its according Coulombic efficiencies. The pure CNT anode was cycled between 3.0 and 0.01 V versus Li/Li<sup>+</sup> at a current density of 100 mA g<sup>-1</sup>. Electrochemical measurements have revealed that pure CNTs exhibited a highly stable cycling performance, retained about 290 mA h g<sup>-1</sup> after the 50<sup>th</sup> cycle as shown in Figure S4. However, in our fabricated SnS@PPy-NB/CNT paper anode, only 15% (wt) multi-walled CNTs were used, so the contribution of CNT in specific capacity is relatively very small (43.5 mA h g<sup>-1</sup> for CNTs vs. 1129.5 mA h g<sup>-1</sup> for SnS@PPy-NBs).



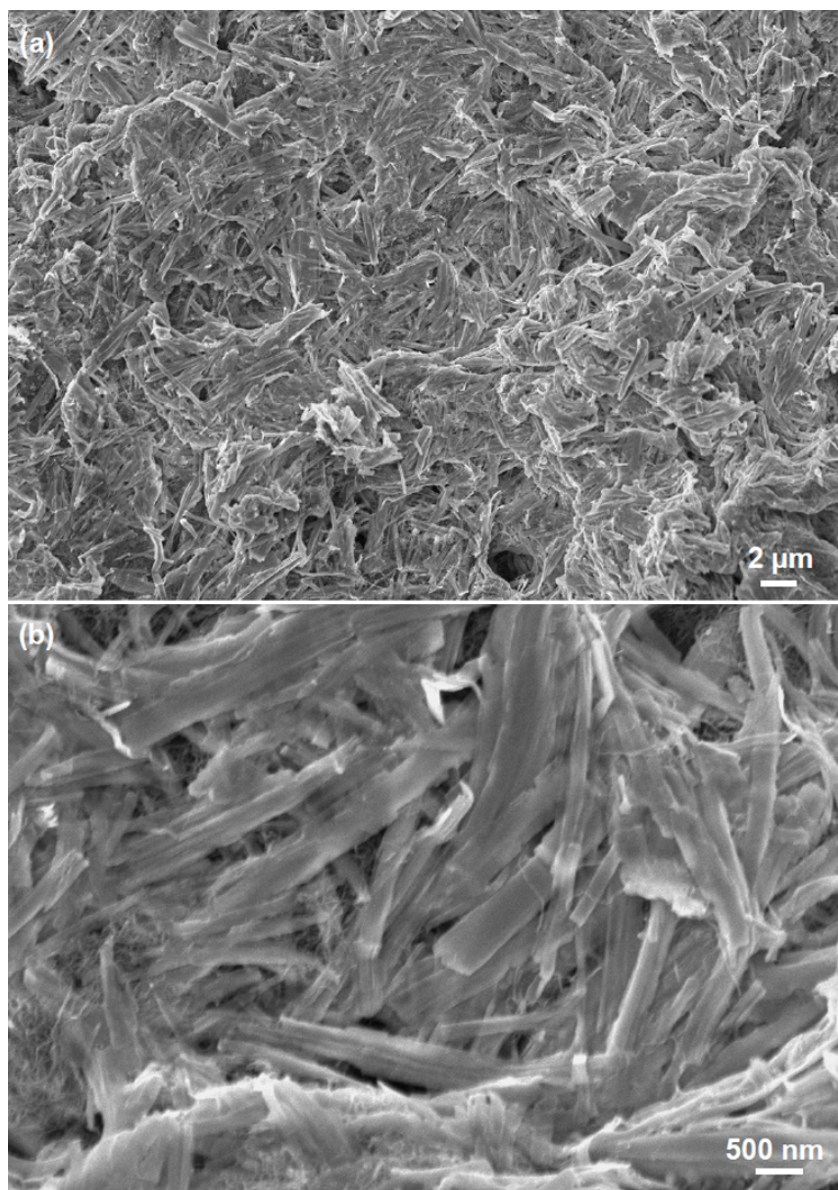

**Figure S5.** SEM images of SnS@PPy-NB/CNT paper electrode after 100 charging/discharging cycles at 0.1C rate, showing that conductive PPy coated SnS nanobelt unit has superior structure stability.

**Table S1.** Stable specific capacity of lithium storage for the SnS@PPy-NB and for the whole electrode (SnS@PPy-NB/CNT)

| Current density (C) | SnS@PPy-NB (mA h g <sup>-1</sup> ) | Whole electrode (mA h g <sup>-1</sup> ) |
|---------------------|------------------------------------|-----------------------------------------|
| 0.1                 | 1173                               | 997                                     |
| 0.2                 | 1032                               | 877                                     |
| 0.5                 | 870                                | 739                                     |
| 1                   | 891                                | 757                                     |
| 2                   | 609                                | 518                                     |
| 5                   | 349                                | 297                                     |
